# Supplementary material for: Effect of testing procedures on gait speed measurement: A systematic review
Source: PubMed Central journal article supplement (PMC7263604; doi:10.1371/journal.pone.0234200), 2020-06-01
Supplement: pone.0234200.s001.pdf [file pone.0234200.s001.pdf]

**S1 Table. Characteristics of pairwise comparisons of starting procedures (n=14) (dynamic versus static start)**

| Author                       | Definition of dynamic start: Distance for acceleration | Subjects ≥60 years included | Subjects with disease included | Subjects using walking aid included | ≥2 trial runs per test protocol | Test distance | Distance for deceleration (static/dynamic) | Timing    | Test surface |
|------------------------------|--------------------------------------------------------|-----------------------------|--------------------------------|-------------------------------------|---------------------------------|---------------|--------------------------------------------|-----------|--------------|
| Amatachaya 2019a             | 2m                                                     | No                          | No                             | No                                  | Yes (no data) <sup>d</sup>      | 10m           | 0m / 2m                                    | Automatic | n.r.         |
| Amatachaya 2019b             | 2m                                                     | Yes (no data) <sup>a</sup>  | No                             | No                                  | Yes (no data) <sup>d</sup>      | 10m           | 0m / 2m                                    | Automatic | n.r.         |
| Amatachaya 2019c             | 2m                                                     | Yes (no data) <sup>a</sup>  | Yes (no data) <sup>b</sup>     | No                                  | Yes (no data) <sup>d</sup>      | 10m           | 0m / 2m                                    | Automatic | n.r.         |
| Johnson 2020a (4m distance)  | 3m                                                     | No                          | No                             | No                                  | Yes (no data) <sup>d</sup>      | 4m            | 0m / 3m                                    | Manual    | Hard         |
| Johnson 2020a (10m distance) | 3m                                                     | No                          | No                             | No                                  | Yes (no data) <sup>d</sup>      | 10m           | 0m / 3m                                    | Manual    | Hard         |
| Johnson 2020b (4m distance)  | 3m                                                     | No                          | No                             | No                                  | Yes (no data) <sup>d</sup>      | 4m            | 0m / 3m                                    | Manual    | Hard         |
| Johnson 2020b (10m distance) | 3m                                                     | No                          | No                             | No                                  | Yes (no data) <sup>d</sup>      | 10m           | 0m / 3m                                    | Manual    | Hard         |
| Kim (manual timer)           | 1.5m                                                   | Yes (no data) <sup>a</sup>  | Yes (no data) <sup>b</sup>     | No                                  | Yes (with data)                 | 4m            | 0m / 1.5m                                  | Manual    | Hard         |
| Kim (automatic timer)        | 1.5m                                                   | Yes (no data) <sup>a</sup>  | Yes (no data) <sup>b</sup>     | No                                  | Yes (with data)                 | 4m            | 0m / 1.5m                                  | Automatic | Hard         |
| Lindholm                     | 2m                                                     | Yes (no data) <sup>a</sup>  | Yes (no data) <sup>b</sup>     | Yes (no data) <sup>c</sup>          | Yes (with data)                 | 10m           | 0m / 0m                                    | Manual    | n.r.         |
| Oh (manual timer)            | 2m                                                     | Yes (with data)             | No                             | No                                  | Yes (with data)                 | 4m            | 0m / 2m                                    | Manual    | Hard         |
| Oh (automatic timer)         | 2m                                                     | Yes (with data)             | No                             | No                                  | No                              | 4m            | 0m / 2m                                    | Automatic | Hard         |
| Sustakoski                   | 0.5m                                                   | Yes (no data) <sup>a</sup>  | Yes (no data) <sup>b</sup>     | No                                  | No                              | 4m            | 0m / 0.5m                                  | Manual    | Hard         |
| Warden                       | 2m                                                     | Yes (no data) <sup>a</sup>  | Yes (no data) <sup>b</sup>     | Yes (no data) <sup>c</sup>          | Yes (with data)                 | 4m            | 0m / 2m                                    | Automatic | n.r.         |

n.r.: not reported

<sup>a</sup> Results for subgroup of persons aged ≥60 years were not reported

<sup>b</sup> Results for subgroup of persons with disease were not reported

<sup>c</sup> Results for subgroup of persons using a walking aid were not reported

<sup>d</sup> Results were reported as the mean value of all trial runs, results were not reported for each trial run separately
