# Supplementary material for: Effect of testing procedures on gait speed measurement: A systematic review
Source: PubMed Central journal article supplement (PMC7263604; doi:10.1371/journal.pone.0234200), 2020-06-01
Supplement: pone.0234200.s002.pdf [file pone.0234200.s002.pdf]

**S2 Table. Characteristics of pairwise comparisons of distance test procedures (n=14) (longer versus shorter distance)**

| Author                        | Definition of test distance (short/ long) | Subjects ≥60 years included | Subjects with disease included | Subjects using walking aid included | ≥2 trial runs per test protocol | Distance for acceleration (short/long) | Distance for deceleration (short/long) | Timing    | Test surface |
|-------------------------------|-------------------------------------------|-----------------------------|--------------------------------|-------------------------------------|---------------------------------|----------------------------------------|----------------------------------------|-----------|--------------|
| Amatachaya 2019a              | 4m/ 10m                                   | No                          | No                             | No                                  | Yes (no data) <sup>d</sup>      | 3m/ 2m                                 | 3m/ 2m                                 | Automatic | n.r.         |
| Amatachaya 2019b              | 4m/ 10m                                   | Yes (no data) <sup>a</sup>  | No                             | No                                  | Yes (no data) <sup>d</sup>      | 3m/ 2m                                 | 3m/ 2m                                 | Automatic | n.r.         |
| Amatachaya 2019c              | 4m/ 10m                                   | Yes (no data) <sup>a</sup>  | Yes (no data) <sup>b</sup>     | No                                  | Yes (no data) <sup>d</sup>      | 3m/ 2m                                 | 3m/ 2m                                 | Automatic | n.r.         |
| Bohannon                      | 2.4m/ 6.1m                                | Yes (with data)             | Yes (no data) <sup>b</sup>     | No                                  | No                              | 0m/ 0m                                 | 0m/ 0m                                 | Manual    | n.r.         |
| Johnson 2020a (static start)  | 4m/ 10m                                   | No                          | No                             | No                                  | Yes (no data) <sup>d</sup>      | 0m/ 0m                                 | 0m/ 0m                                 | Manual    | Hard         |
| Johnson 2020a (dynamic start) | 4m/ 10m                                   | No                          | No                             | No                                  | Yes (no data) <sup>d</sup>      | 3m/ 3m                                 | 3m/ 3m                                 | Manual    | Hard         |
| Johnson 2020b (static start)  | 4m/ 10m                                   | No                          | No                             | No                                  | Yes (no data) <sup>d</sup>      | 0m/ 0m                                 | 0m/ 0m                                 | Manual    | Hard         |
| Johnson 2020b (dynamic start) | 4m/ 10m                                   | No                          | No                             | No                                  | Yes (no data) <sup>d</sup>      | 3m/ 3m                                 | 3m/ 3m                                 | Manual    | Hard         |
| Karpman                       | 4m/ 10m                                   | Yes (no data) <sup>a</sup>  | Yes (no data) <sup>b</sup>     | Yes (no data) <sup>c</sup>          | Yes (no data) <sup>d</sup>      | 2m/ 2m                                 | 2m/ 2m                                 | Automatic | Hard         |
| Lyons                         | 3m/ 6m                                    | Yes (no data) <sup>a</sup>  | Yes (no data) <sup>b</sup>     | n.r.                                | Yes (with data)                 | 0m/ 0m                                 | 0.5m/ 0.5m                             | Manual    | n.r.         |
| Ng 2012                       | 5m/ 10m                                   | Yes (no data) <sup>a</sup>  | Yes (no data) <sup>b</sup>     | Yes (no data) <sup>c</sup>          | Yes (no data) <sup>d</sup>      | 2m/ 2m                                 | 2m/ 2m                                 | Manual    | n.r.         |
| Ng 2013                       | 5m/ 10m                                   | Yes (no data) <sup>a</sup>  | No                             | No                                  | No                              | 2m/ 2m                                 | 2m/ 2m                                 | Manual    | n.r.         |
| Pasma                         | 4m/ 10m                                   | Yes (with data)             | Yes (no data) <sup>b</sup>     | Yes (no data) <sup>c</sup>          | Yes (no data) <sup>d</sup>      | 0m/ 2.5m                               | 1m/ 2.5m                               | Manual    | n.r.         |
| Peters 2013                   | 4m/ 10m                                   | Yes (with data)             | Yes (no data) <sup>b</sup>     | Yes (no data) <sup>c</sup>          | Yes (with data)                 | 2m/ 5m                                 | 2m/ 2m                                 | Manual    | n.r.         |

n.r.: not reported

<sup>a</sup> Results for subgroup of persons aged ≥60 years were not reported

<sup>b</sup> Results for subgroup of persons with disease were not reported

<sup>c</sup> Results for subgroup of persons using a walking aid were not reported

<sup>d</sup> Results were reported as the mean value of all trial runs, results were not reported for each trial run separately
