# Supplementary material for: Effect of testing procedures on gait speed measurement: A systematic review
Source: PubMed Central journal article supplement (PMC7263604; doi:10.1371/journal.pone.0234200), 2020-06-01
Supplement: pone.0234200.s003.pdf [file pone.0234200.s003.pdf]

**S3 Table. Characteristics of pairwise comparisons of timing test procedures (n=12) (automatic versus manual)**

| Author                          | Subjects ≥60 years included | Subjects with disease included | Subjects using walking aid included | ≥2 trial runs per test protocol | Distance for acceleration | Test distance | Distance for deceleration | Test surface |
|---------------------------------|-----------------------------|--------------------------------|-------------------------------------|---------------------------------|---------------------------|---------------|---------------------------|--------------|
| Barry                           | Yes (with data)             | Yes (no data) <sup>b</sup>     | Yes (no data) <sup>c</sup>          | Yes (no data) <sup>d</sup>      | 0.6m                      | 4.27m         | 0.9m                      | Hard         |
| Bisca (walkway distance 4m)     | Yes (with data)             | Yes (with data)                | Not specified                       | Yes (no data)                   | 0m                        | 4m            | 0m                        | Hard         |
| Bisca (walkway distance 8m)     | Yes (with data)             | Yes (with data)                | n.r.                                | Yes (no data)                   | 2m                        | 4m            | 2m                        | Hard         |
| Karpman                         | Yes (no data) <sup>a</sup>  | Yes (with data)                | Yes (no data) <sup>c</sup>          | Yes (no data) <sup>d</sup>      | 2m                        | 4m            | 2m                        | Hard         |
| Kim (static start)              | Yes (with data)             | Yes (no data) <sup>b</sup>     | No                                  | Yes (with data)                 | 0m                        | 4m            | 0m                        | Hard         |
| Kim (dynamic start)             | Yes (with data)             | Yes (no data) <sup>b</sup>     | No                                  | Yes (with data)                 | 1.5m                      | 4m            | 1.5m                      | Hard         |
| Oh (static start)               | Yes (with data)             | No                             | No                                  | Yes (with data)                 | 0m                        | 4m            | 0m                        | Hard         |
| Oh (dynamic start)              | Yes (with data)             | No                             | No                                  | Yes (with data)                 | 2m                        | 4m            | 2m                        | Hard         |
| Peters 2013 (4m test distance)  | Yes (with data)             | Yes (no data) <sup>b</sup>     | Yes (no data) <sup>c</sup>          | Yes (with data)                 | 2m                        | 4m            | 2m                        | n.r.         |
| Peters 2013 (10m test distance) | Yes (with data)             | Yes (no data) <sup>b</sup>     | Yes (no data) <sup>c</sup>          | Yes (with data)                 | 5m                        | 10m           | 5m                        | n.r.         |
| Sustakoski                      | Yes (with data)             | Yes (no data) <sup>b</sup>     | n.r.                                | No                              | 0.6m                      | 4m            | 0.6m                      | Hard         |
| Warden                          | Yes (no data) <sup>a</sup>  | Yes (no data) <sup>b</sup>     | Yes (no data) <sup>c</sup>          | Yes (with data)                 | 0m                        | 4m            | 0m                        | n.r.         |

n.r.: not reported

<sup>a</sup> Results for subgroup of persons aged ≥60 years were not reported

<sup>b</sup> Results for subgroup of persons with disease were not reported

<sup>c</sup> Results for subgroup of persons using a walking aid were not reported

<sup>d</sup> Results were reported as the mean value of all trial runs, results were not reported for each trial run separately
