# Supplementary material for: Effect of testing procedures on gait speed measurement: A systematic review
Source: PubMed Central journal article supplement (PMC7263604; doi:10.1371/journal.pone.0234200), 2020-06-01
Supplement: pone.0234200.s004.pdf [file pone.0234200.s004.pdf]

**S4 Table. Characteristics of pairwise comparisons of surface test procedures (n=6) (hard versus soft surface)**

| Author         | Subjects $\geq 60$ years included | Subjects with disease included | Subjects using walking aid included | $\geq 2$ trial runs per test protocol | Distance for acceleration | Test distance | Distance for deceleration | Timing |
|----------------|-----------------------------------|--------------------------------|-------------------------------------|---------------------------------------|---------------------------|---------------|---------------------------|--------|
| Promkeaw 2019a | Yes (no data) <sup>a</sup>        | Yes (with data)                | Yes (no data) <sup>b</sup>          | No                                    | 3m                        | 4m            | 3m                        | n.r.   |
| Promkeaw 2019b | Yes (no data) <sup>a</sup>        | No                             | No                                  | No                                    | 3m                        | 4m            | 3m                        | n.r.   |
| Promkeaw 2019a | Yes (no data) <sup>a</sup>        | Yes (with data)                | Yes (no data) <sup>b</sup>          | No                                    | 3m                        | 4m            | 3m                        | n.r.   |
| Promkeaw 2019b | Yes (no data) <sup>a</sup>        | No                             | No                                  | No                                    | 3m                        | 4m            | 3m                        | n.r.   |
| Stephens       | Yes (no data) <sup>a</sup>        | Yes (with data)                | n.r.                                | Yes (with data)                       | 2m                        | 6m            | 2m                        | n.r.   |
| Willmott       | Yes (with data)                   | Yes (with data)                | n.r.                                | No                                    | 2.25m                     | 10m           | 2.25m                     | n.r.   |

n.r.: not reported

<sup>a</sup> Results for subgroup of persons aged  $\geq 60$  years were not reported

<sup>b</sup> Results for subgroup of persons using a walking aid were not reported
