# Supplementary material for: Effect of testing procedures on gait speed measurement: A systematic review
Source: PubMed Central journal article supplement (PMC7263604; doi:10.1371/journal.pone.0234200), 2020-06-01
Supplement: pone.0234200.s006.pdf [file pone.0234200.s006.pdf]

**S6 Table. Impact of starting procedures on gait speed results (n=14)**

| Author                       | Gait speed static start: (m/sec) mean (SD) | Gait speed dynamic start: (m/sec) mean (SD) | Mean difference gait speed dynamic vs. static start: (m/sec) (95%CI) | p-value <sup>a)</sup> | Intraclass correlation coefficient) (95% CI) | Risk of bias (%) |
|------------------------------|--------------------------------------------|---------------------------------------------|----------------------------------------------------------------------|-----------------------|----------------------------------------------|------------------|
| Amatachaya 2019a             | 1.27 (1.69)                                | 1.38 (0.18)                                 | 0.11 (n.r.)                                                          | <0.001                | n.r.                                         | 87.5             |
| Amatachaya 2019b             | 1.13 (0.14)                                | 1.18 (0.16)                                 | 0.05 (n.r.)                                                          | 0.018                 | n.r.                                         | 87.5             |
| Amatachaya 2019c             | 0.53 (0.17)                                | 0.59 (0.20)                                 | 0.06 (n.r.)                                                          | 0.004                 | n.r.                                         | 87.5             |
| Johnson 2020a (4m distance)  | 1.05 (0.03)                                | 1.4 (0.04)                                  | 0.35 (n.r.)                                                          | <0.001                | n.r.                                         | 66.7             |
| Johnson 2020a (10m distance) | 1.28 (0.03)                                | 1.44 (0.03)                                 | 0.16 (n.r.)                                                          | <0.001                | n.r.                                         | 66.7             |
| Johnson 2020b (4m distance)  | 1.34 (0.03)                                | 1.41 (0.03)                                 | 0.07 (n.r.)                                                          | 0.075                 | n.r.                                         | 66.7             |
| Johnson 2020b (10m distance) | 1.44 (0.03)                                | 1.45 (0.03)                                 | 0.01 (n.r.)                                                          | 1.00                  | n.r.                                         | 66.7             |
| Kim (manual timer)           | 1.06 (0.20)                                | 1.12 (0.22)                                 | 0.06 (n.r.)                                                          | <0.001                | R <sup>2</sup> = 0.76;                       | 33.3             |
| Kim (automatic timer)        | 1.13 (0.24)                                | 1.19 (0.25)                                 | 0.06 (n.r.)                                                          | <0.001                | R <sup>2</sup> =0.72                         | 33.3             |
| Lindholm                     | 1.11 (0.29)                                | 1.09 (0.28)                                 | -0.02 (-0.008 to -0.026)                                             | <0.001                | 0.98 (0.97 to 0.99)                          | 36.3             |
| Oh (manual timer)            | 1.21 (0.21)                                | 1.27 (0.20)                                 | 0.06 (0.03 to 0.08)                                                  | <0.001                | n.r.                                         | 66.7             |
| Oh (automatic timer)         | 1.20 (0.22)                                | 1.22 (0.21)                                 | 0.02 (0.002 to 0.05)                                                 | 0.135                 | n.r.                                         | 66.7             |
| Sustakoski                   | 0.97 (0.23)                                | 1.13 (0.25)                                 | 0.16 (0.14 to 0.19)                                                  | <0.001                | n.r.                                         | 55.6             |
| Warden                       | n.r.                                       | n.r.                                        | 0.05 (-0.15 to 0.24)                                                 | >0.05                 | n.r.                                         | 55.6             |

Abbreviations: SD, standard deviation; CI, confidence interval; n.r., not reported. For characteristics of studies, see Table 1. For definition of risk of bias, see Methods section.

a) p-value reported for comparisons of means method 1 vs. 2
