# Supplementary material for: Effect of testing procedures on gait speed measurement: A systematic review
Source: PubMed Central journal article supplement (PMC7263604; doi:10.1371/journal.pone.0234200), 2020-06-01
Supplement: pone.0234200.s009.pdf [file pone.0234200.s009.pdf]

**S9 Table. Impact of surfaces on gait speed results (n=6)**

| Author         | Description of hard surface | Description of soft surface | Gait speed of hard surface: (m/sec) mean (SD) | Gait speed of soft surface: (m/sec) mean (SD) | Mean difference gait speed testing soft vs. hard surface: (m/sec) (95%CI) | p-value <sup>a)</sup> | Intraclass correlation coefficient) (95% CI) | Risk of bias (%) |
|----------------|-----------------------------|-----------------------------|-----------------------------------------------|-----------------------------------------------|---------------------------------------------------------------------------|-----------------------|----------------------------------------------|------------------|
| Promkeaw 2019a | Hard                        | Artificial Grass            | 0.66<br>(0.41 to 0.99)<br>Median (IQR)        | 0.55<br>(0.33 to 0.68)<br>Median (IQR)        | -0.11 (n.r.)                                                              | <0.001                | n.r.                                         | 75.0             |
| Promkeaw 2019b | Hard                        | Artificial Grass            | 1.10<br>(0.17 to 1.10)<br>Median (IQR)        | 1.00<br>(0.88-1.10)<br>Median (IQR)           | -0.10 (n.r.)                                                              | <0.001                | n.r.                                         | 75.0             |
| Promkeaw 2019a | Hard                        | Soft                        | 0.66<br>(0.41 to 0.99)<br>Median (IQR)        | 0.48<br>(0.31 to 0.60)<br>Median (IQR)        | -0.18 (n.r.)                                                              | <0.001                | n.r.                                         | 75.0             |
| Promkeaw 2019b | Hard                        | Soft                        | 1.10<br>(0.17 to 1.10)<br>Median (IQR)        | 0.92<br>(0.82 to 0.92)<br>Median (IQR)        | -0.18 (n.r.)                                                              | <0.001                | n.r.                                         | 75.0             |
| Stephens       | Parquetry                   | Carpet                      | 0.79 (0.23)                                   | 0.75 (0.24)                                   | -0.04 (n.r.)                                                              | <0.05                 | r=0.92                                       | 44.4             |
| Willmott       | Vinyl                       | Carpet                      | 0.40 (0.17)                                   | 0.48 (0.19)                                   | 0.08 (n.r.)                                                               | <0.001 <sup>b)</sup>  | N.r.                                         | 88.9             |

Abbreviations: SD, standard deviation; CI, confidence interval; n.r., not reported; IQR, interquartile range. For characteristics of studies, see Table 1. For definition of risk of bias, see Methods section.

- a) p-value reported for comparisons of means method 1 vs. 2
- b) One-tailed p-value indicated
