# Supplementary material for: Effect of testing procedures on gait speed measurement: A systematic review
Source: PubMed Central journal article supplement (PMC7263604; doi:10.1371/journal.pone.0234200), 2020-06-01
Supplement: pone.0234200.s010.pdf [file pone.0234200.s010.pdf]

**S10 Table. Impact of walkway test procedures on gait speed results (n=7)**

| Author       | Description of usual walk test | Description of electronic walkway | Gait speed of usual walk test: (m/sec) mean (SD) | Gait speed of electronic walkway: (m/sec) mean (SD) | Mean difference gait speed testing usual electronic walkway vs. usual walk test: (m/sec) (95%CI) | p-value <sup>a)</sup> | Intraclass correlation coefficient) (95% CI) | Risk of bias (%) |
|--------------|--------------------------------|-----------------------------------|--------------------------------------------------|-----------------------------------------------------|--------------------------------------------------------------------------------------------------|-----------------------|----------------------------------------------|------------------|
| Bryant 2013  | Floor (5m)                     | Walkway GAITRite                  | 0.82 (0.24)                                      | 0.86 (0.25)                                         | 0.04 (n.r.)                                                                                      | 0.018                 | 0.96 (0.92 to 0.98)                          | 77.8             |
| Bryant 2015  | Overground (5m)                | Walkway GAITRite                  | 0.97 (0.29)                                      | 1.10 (0.32)                                         | 0.04 (n.r.)                                                                                      | 0.016                 | 0.85 (0.58 to 0.95)                          | 100.0            |
| Cleland      | 10MWT                          | Walkway GAITRite                  | 0.75 (0.21)                                      | 0.67 (0.16)                                         | -0.08 (-0.05 to -0.10)                                                                           | <0.001                | 0.77 (0.46 to 0.89)                          | 88.9             |
| Peters 2014a | Floor (3MWT)                   | Walkway GAITRite                  | 0.89 (0.15)                                      | 1.03 (0.16)                                         | 0.14 (n.r.)                                                                                      | <0.05                 | 0.49 (-0.09 to 0.78)                         | 44.4             |
| Peters 2014b | Floor (3MWT)                   | Walkway GAITRite                  | 0.52 (0.10)                                      | 0.56 (0.11)                                         | 0.04 (n.r.)                                                                                      | <0.05                 | 0.75 (0.22 to 0.90)                          | 44.4             |
| Peters 2014c | Floor (3MWT)                   | Walkway GAITRite                  | 0.27 (0.11)                                      | 0.25 (0.11)                                         | -0.02 (n.r.)                                                                                     | <0.05                 | 0.89 (0.72 to 0.95)                          | 44.4             |
| Sustakoski   | Overground (4m)                | Walkway GaitMat II                | 1.14 (0.25)                                      | 1.06 (0.26)                                         | 0.07 (0.04-0.10)                                                                                 | <0.001                | n.r.                                         | 55.6             |

Abbreviations: SD, standard deviation; n.r., not reported; CI, confidence interval; 10MWT, 10-m walk test; 3MWT, 3-m walk test. For characteristics of studies, see Table 1. For definition of risk of bias, see Methods section.

a) p-value reported for comparisons of means method 1 vs. 2
